# Supplementary material for: Proof of Concept for an Adaptive Treatment Strategy to Prevent Failures in Internet-Delivered CBT: A Single-Blind Randomized Clinical Trial With Insomnia Patients
Source: Atypon-hosted journal article supplement (doi:10.1176/appi.ajp.2018.18060699), 2019-01-30
Supplement: appi.ajp.2018.18060699.ds001_AppendicesA-B-D.pdf [file appi.ajp.2018.18060699.ds001_AppendicesA-B-D.pdf]

 


Psychiatry Online
